# Supplementary material for: A Phylogenetic and Phenotypic Analysis of Salmonella enterica Serovar Weltevreden, an Emerging Agent of Diarrheal Disease in Tropical Regions
Source: PLOS journal article supplement (doi:10.1371/journal.pntd.0004446), 2016-02-11

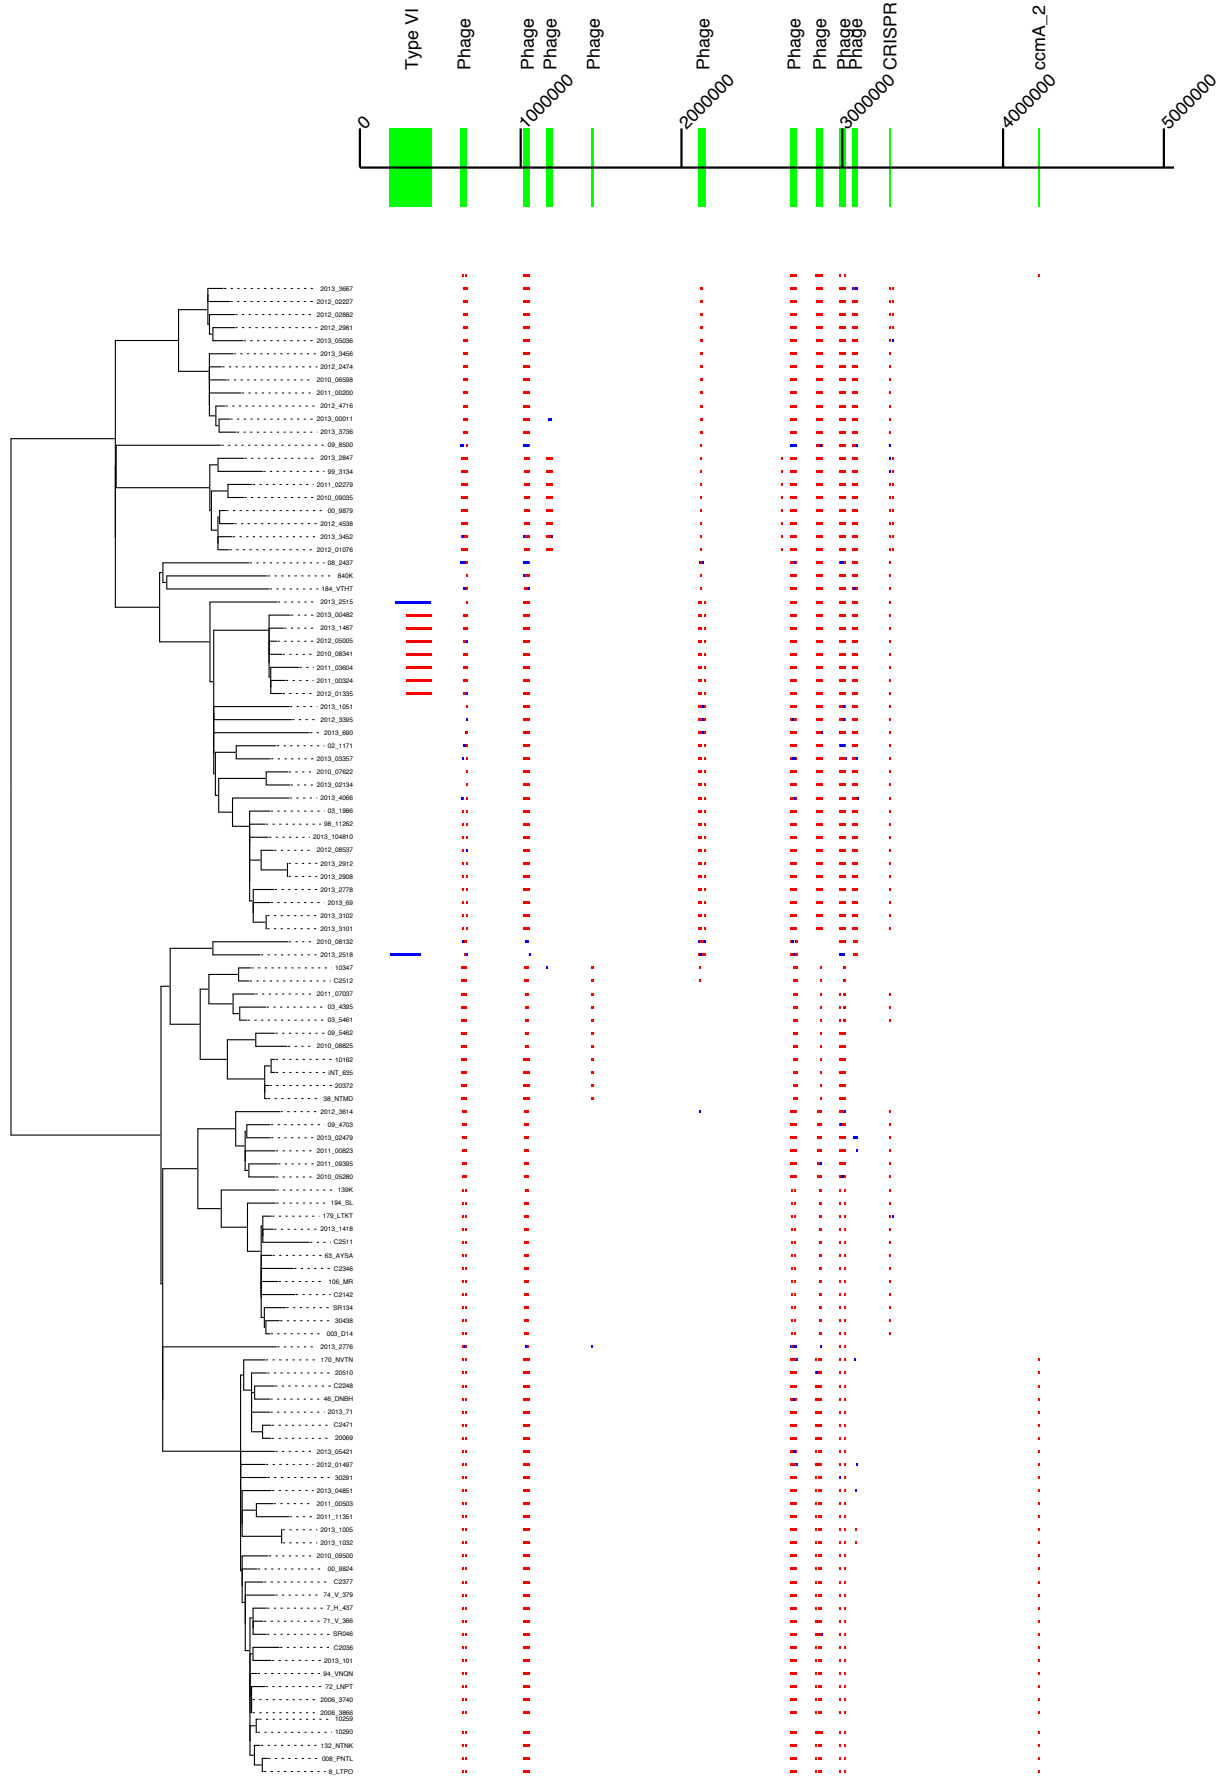

Supplement: S3 (10.1371/journal.pntd.0004446.s003) [file journal.pntd.0004446.s003]
